# Supplementary material
Source: PubMed Central journal article supplement (PMC9555952)
Supplement: mmc1.pdf [file mmc1.pdf]

# THE LANCET

## Child & Adolescent Health

### Supplementary appendix

This appendix formed part of the original submission. We post it as supplied by the authors.

Supplement to: Aguilera-Alonso D, Alonso-Cadenas JA, Roguera-Sopena M, Lorusso N, San Miguel LG, Calvo C. Monkeypox virus infections in children in Spain during the first months of the 2022 outbreak. *Lancet Child Adolesc Health* 2022; published online Sept 1. [https://doi.org/10.1016/S2352-4642\(22\)00250-4](https://doi.org/10.1016/S2352-4642(22)00250-4).

## Supplementary appendix

**Appendix 1:** Supplementary Figure S1 page 1

**Appendix 2:** Supplementary Table S1 page 2

**Appendix 3:** Data management and Ethics page 4

**Supplementary Figure S1.** Cases with laboratory-confirmed monkeypox infection in Spain during the 2022 monkeypox outbreak. The number of cases under 18 years of age in each period is listed above each column. The last week of the figure is incomplete, and late reporting could explain the lower number of cases during that period. Total number of cases obtained from the European Centre for Disease Prevention and Control (ECDC), updated on August 9, 2022.

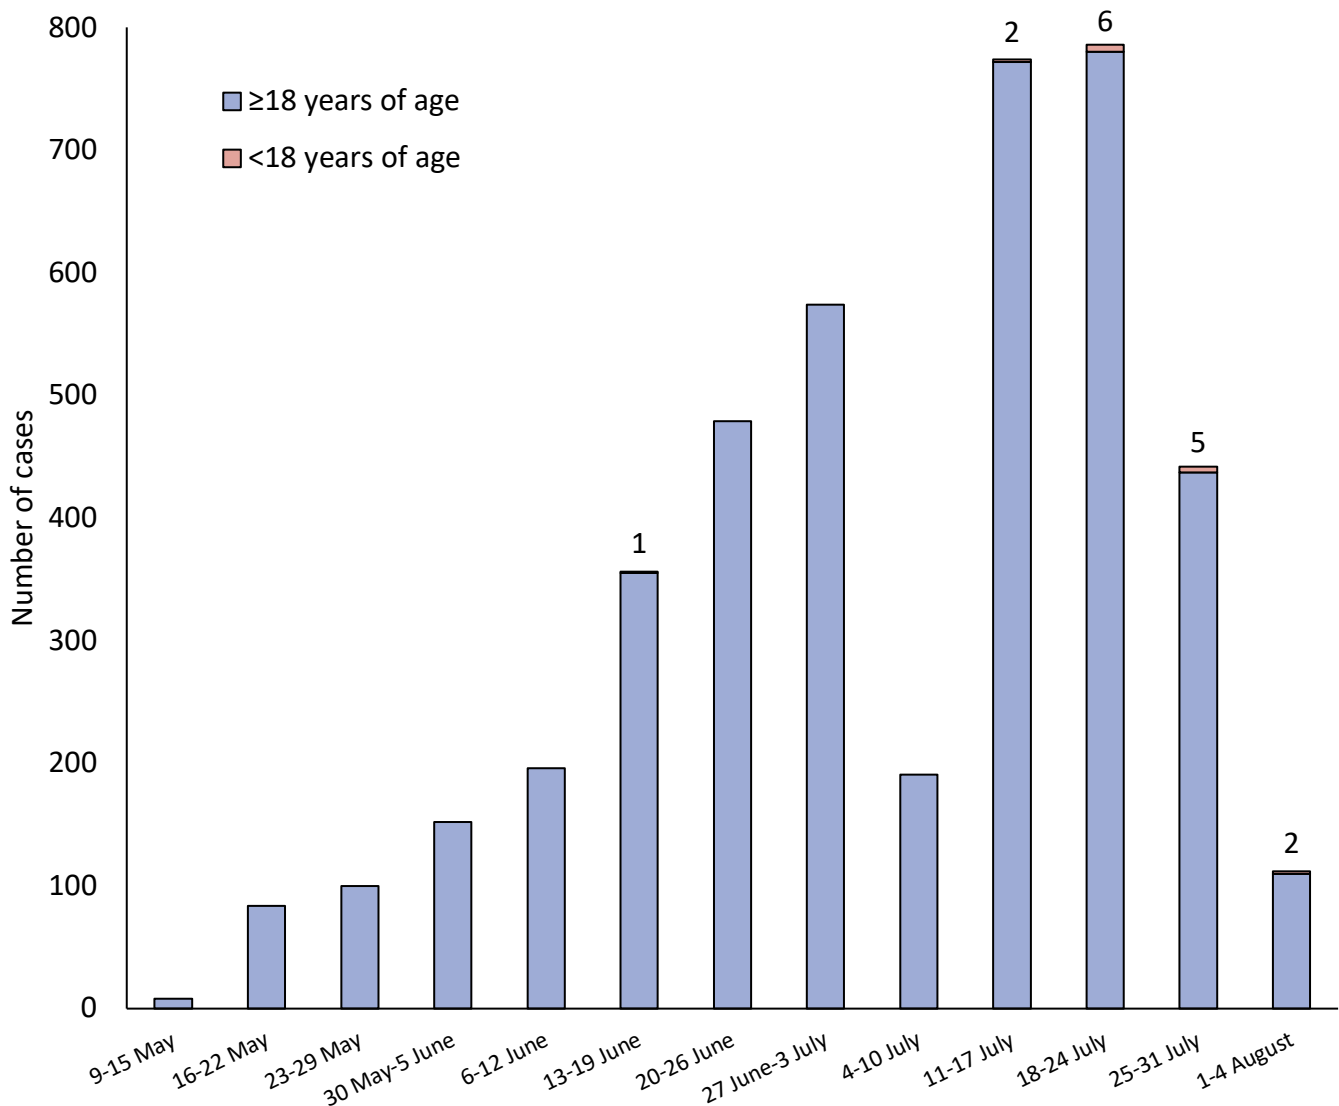

**Supplementary Table S1.** Cases under 18 years of age with laboratory-confirmed monkeypox virus infection in Spain from April 26, 2022, to August 3, 2022, sorted by age.

|                               | <b>Case 1</b>     | <b>Case 2</b>     | <b>Case 3</b>                    | <b>Case 4</b>     | <b>Case 5</b>                      | <b>Case 6</b>                      | <b>Case 7</b>                      |
|-------------------------------|-------------------|-------------------|----------------------------------|-------------------|------------------------------------|------------------------------------|------------------------------------|
| <b>Date of diagnosis</b>      | 19/7/22           | 21/7/22           | 25/7/22                          | 17/6/22           | 25/7/22                            | 29/7/22                            | 1/8/22                             |
| <b>Age</b>                    | 7 months          | 10 months         | 13 months                        | 3 years           | 13 years                           | 13 years                           | 13 years                           |
| <b>Gender</b>                 | Male              | Female            | Male                             | Female            | Male                               | Male                               | Female                             |
| <b>Country of birth</b>       | Spain             | Spain             | Spain                            | Spain             | Spain                              | Spain                              | Spain                              |
| <b>Transmission route</b>     | Household contact | Household contact | Unknown                          | Household contact | Contact with contaminated material | Contact with contaminated material | Contact with contaminated material |
| <b>Setting of infection</b>   | Home (parents)    | Home (parents)    | Unknown                          | Home (parents)    | Piercing studio                    | Piercing studio                    | Piercing studio                    |
| <b>Specimen of detection*</b> | Skin lesion       | Skin lesion       | Skin lesion                      | Skin lesion       | Skin lesion                        | Skin lesion                        | Skin lesion                        |
| <b>Manifestations</b>         | Rash              | Rash              | Rash, fever, vomiting, diarrhoea | Rash and fever    | Rash                               | Rash                               | Rash                               |
| <b>Antiviral treatment</b>    | No                | No                | No                               | No                | No                                 | No                                 | No                                 |
| <b>Hospitalization</b>        | No                | No                | No                               | No                | No                                 | No                                 | No                                 |
| <b>Complications</b>          | No                | No                | Superinfection (skin abscess)    | No                | No                                 | No                                 | No                                 |
| <b>Secondary cases</b>        | No                | No                | No                               | No                | No                                 | No                                 | No                                 |

|                               | Case 8                             | Case 9                             | Case 10                            | Case 11                            | Case 12                            | Case 13                                                | Case 14                                               | Case 15                            | Case 16                               |
|-------------------------------|------------------------------------|------------------------------------|------------------------------------|------------------------------------|------------------------------------|--------------------------------------------------------|-------------------------------------------------------|------------------------------------|---------------------------------------|
| <b>Date of diagnosis</b>      | 25/7/22                            | 16/7/22                            | 20/7/22                            | 22/7/22                            | 25/7/22                            | 2/8/22                                                 | 11/7/22                                               | 20/7/22                            | 22/7/22                               |
| <b>Age</b>                    | 15 years                           | 16 years                                               | 17 years                                              | 17 years                           | 17 years                              |
| <b>Gender</b>                 | Male                               | Male                               | Male                               | Female                             | Female                             | Male                                                   | Male                                                  | Male                               | Female                                |
| <b>Country of birth</b>       | Spain                              | Spain                              | Spain                              | Spain                              | Spain                              | Spain                                                  | Spain                                                 | Spain                              | Spain                                 |
| <b>Transmission route</b>     | Contact with contaminated material | Sexual close contact               | Contact with contaminated material | Contact with contaminated material | Contact with contaminated material | Sexual close contact                                   | Sexual close contact                                  | Contact with contaminated material | Contact with contaminated material    |
| <b>Setting of infection</b>   | Piercing studio                    | Unknown                            | Piercing studio                    | Piercing studio                    | Piercing studio                    | Unknown                                                | Unknown                                               | Piercing studio                    | Piercing studio                       |
| <b>Specimen of detection*</b> | Skin lesion                                            | Skin lesion                                           | Skin lesion                        | Skin lesion                           |
| <b>Manifestations</b>         | Rash                               | Rash, lymphadenopathy and headache | Rash                               | Rash                               | Rash, fever and lymphadenopathy    | Rash, asthenia, fever, lymphadenopathy and sore throat | Rash, asthenia, lymphadenopathy, headache and myalgia | Rash                               | Rash, lymphadenopathy and sore throat |
| <b>Antiviral treatment</b>    | No                                 | No                                 | No                                 | No                                 | No                                 | No                                                     | No                                                    | No                                 | No                                    |
| <b>Hospitalization</b>        | No                                 | No                                 | No                                 | No                                 | No                                 | No                                                     | No                                                    | No                                 | No                                    |
| <b>Complications</b>          | No                                 | No                                 | No                                 | No                                 | No                                 | No                                                     | No                                                    | No                                 | No                                    |
| <b>Secondary cases</b>        | No                                 | Unknown                            | No                                 | No                                 | No                                 | Unknown                                                | Unknown                                               | No                                 | No                                    |

\*Detected by monkeypox virus or *Orthopoxvirus* generic real-time PCR.

## **Data management and Ethics**

This study involved the use of patient medical data from the National Surveillance Network (RENAVE), which is the official source for public health surveillance activities in Spain. RENAVE follows the mandate of Spanish and international legislation and is hosted by public institutions. Individual informed consent is not required for data to be included in RENAVE, and all data are pseudonymised, meeting all considerations regarding personal data protection. As this work is in line with alert, response and surveillance activities, no explicit ethics assessment was required. Further information can be found on this website:

<https://www.isciii.es/QueHacemos/Servicios/VigilanciaSaludPublicaRENAVE/EnfermedadesTransmisibles/Paginas/Legislacion.aspx>
